# Supplementary material
Source: MDPI journal article supplement (https://www.mdpi.com/2313-0105/9/7/377)
Supplement: s1 [file s1]

# Impact of silicon content and particle size in lithium ion-battery anodes on particulate properties and electrochemical performance

Jannes Müller<sup>1,2,\*</sup>, Peter Michalowski<sup>1,2</sup>, Arno Kwade<sup>1,2</sup>

<sup>1</sup> Institute for Particle Technology, Technische Universität Braunschweig, Volkmaroder Straße 5, 38104 Braunschweig, Germany

<sup>2</sup> Battery LabFactory Braunschweig, Technische Universität Braunschweig, Langer Kamp 19, 38106 Braunschweig, Germany

\* Correspondence: jannes.mueller@tu-braunschweig.de

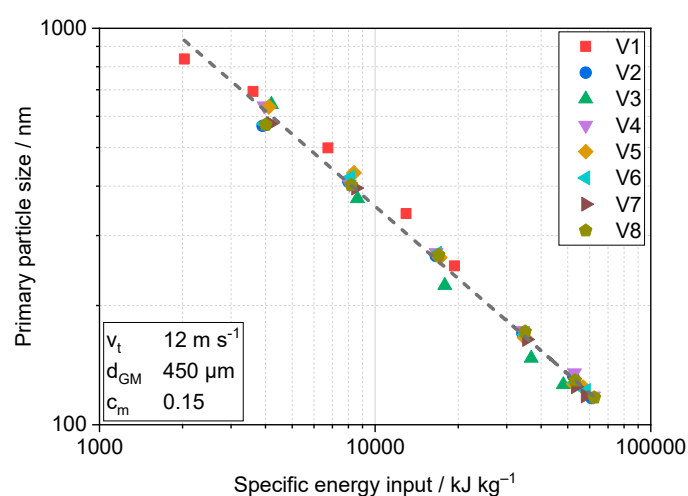

**Figure S1.** Primary particle size (measured by ultrasonic extinction) as a function of specific energy input during grinding (V1-V8 relate to separate experiments, all conducted under the same conditions)

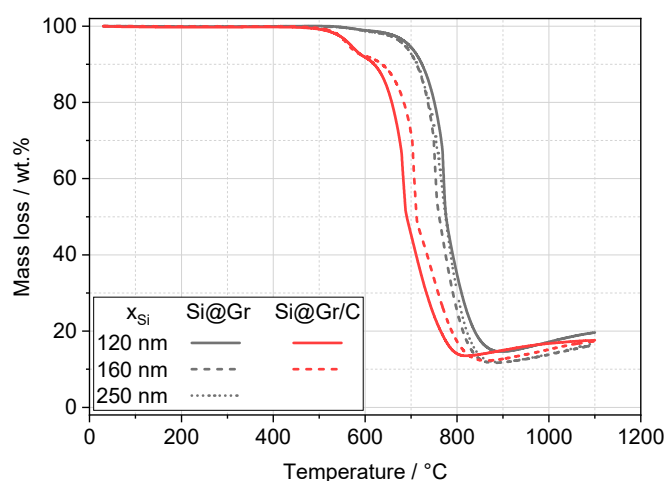

**Figure S2.** Thermogravimetric analysis of Si@Gr and Si@Gr/C composite particles with a variation of Si particle size

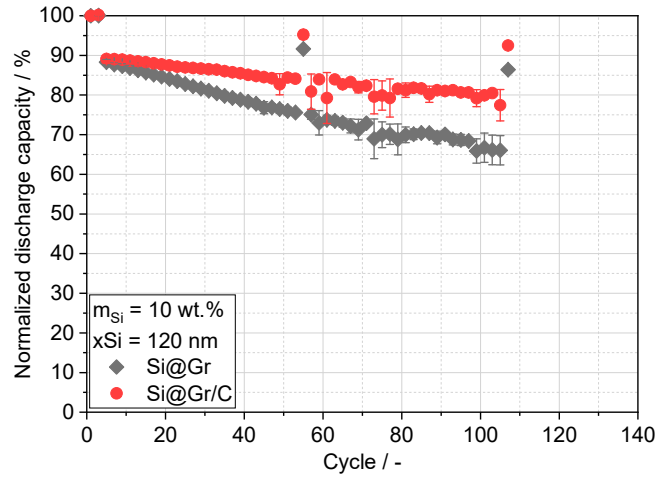

**Figure S3.** Normalized capacity of Si@Gr and Si@Gr/C anodes during long term cycling test (0.5C) in half cell configuration (normalized to the capacity at 0.1C before long-term cycling)

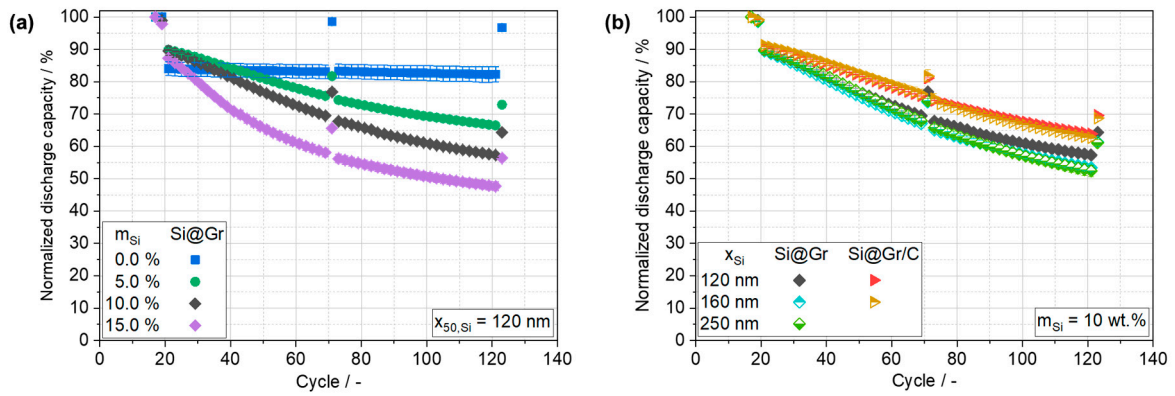

**Figure S4.** (a) Relative discharge capacity during long term cycling at 0.5C (normalized to the capacity at 0.1C after rate capability test and before long term cycling test, cycle 17); (a) Si@Gr with a variation of Si content; (b) Si@Gr and Si@Gr/C with a variation of particle size

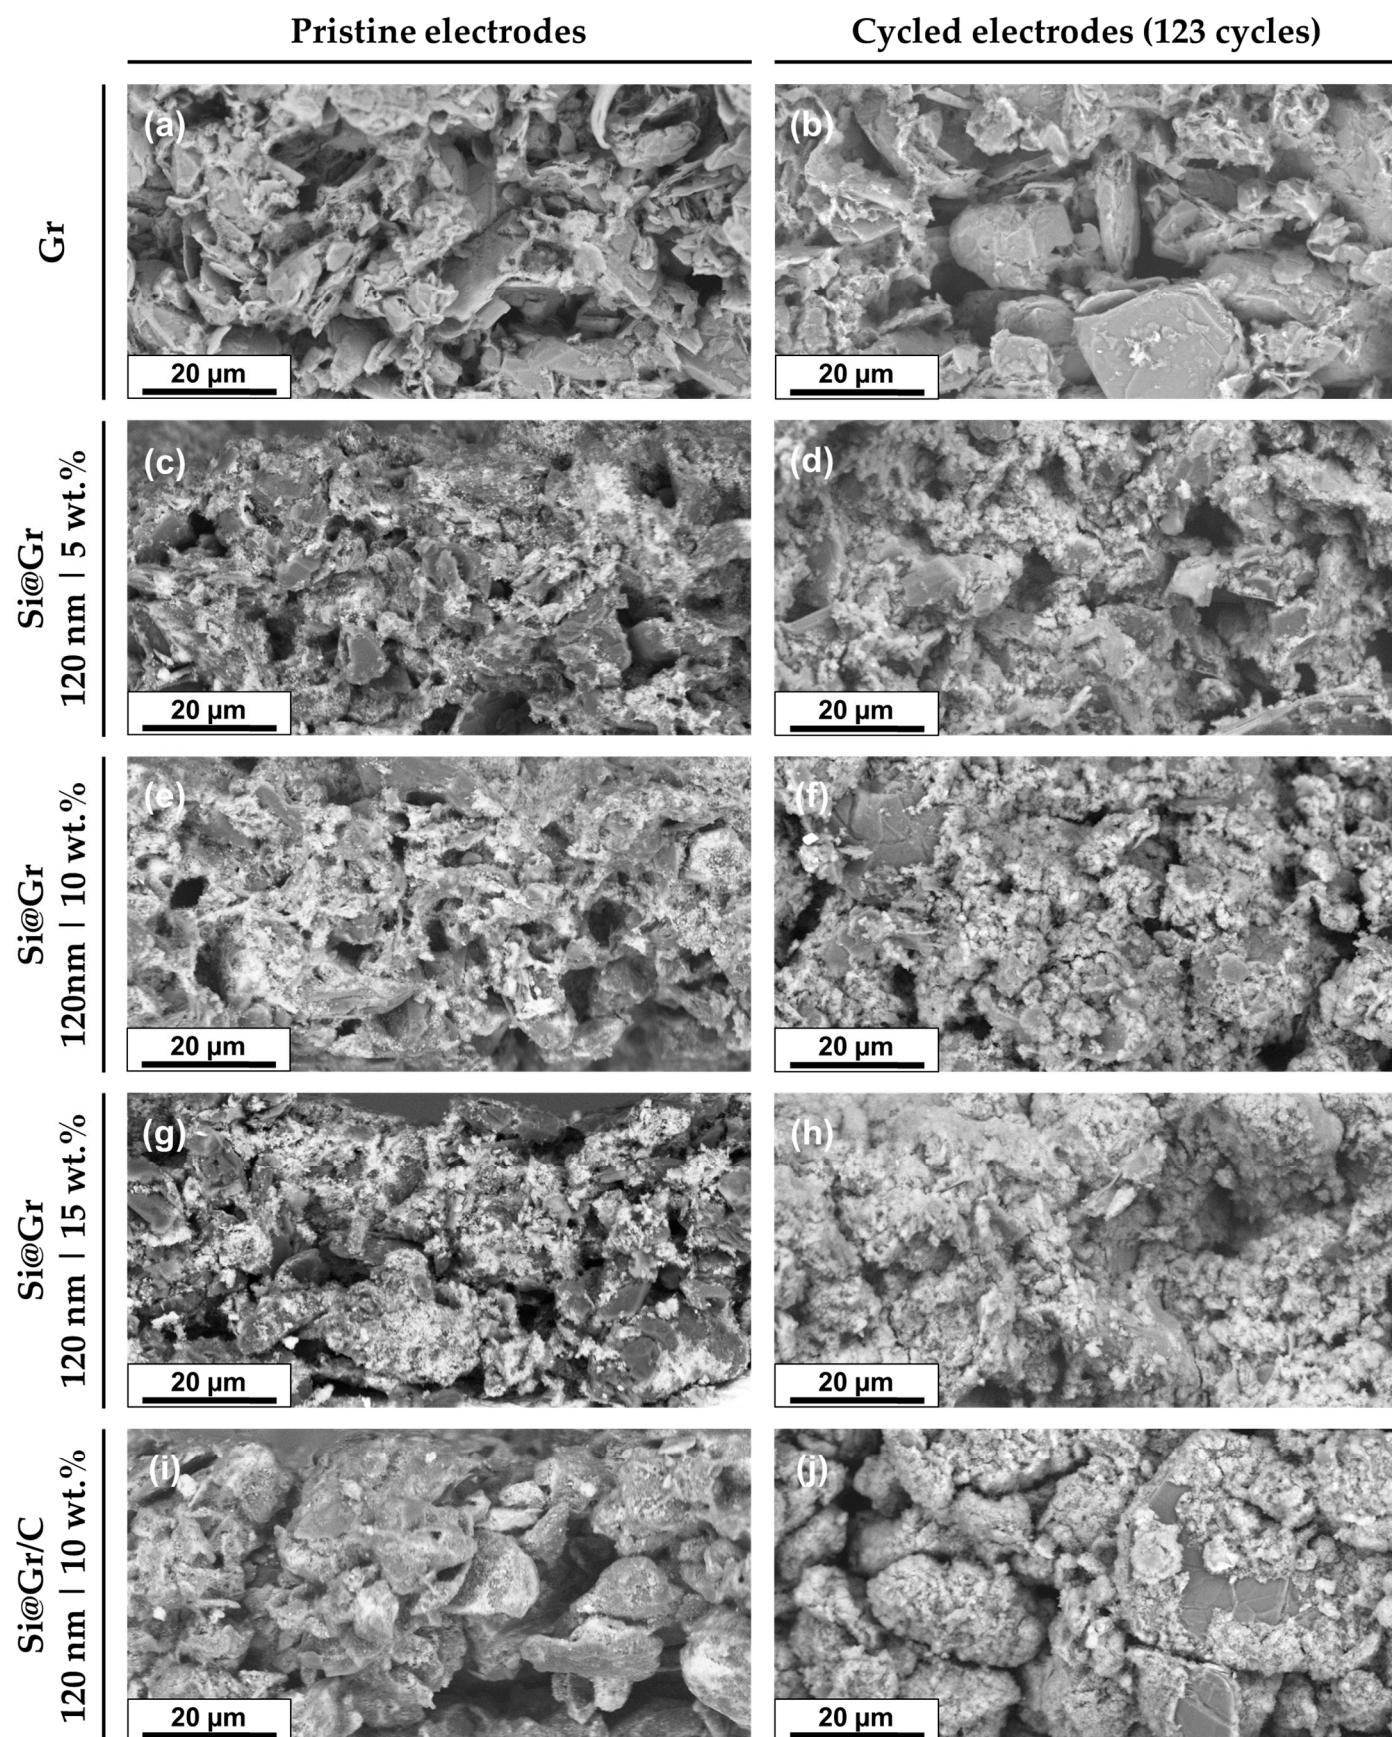

**Figure S5.** SEM images of Si@Gr and Si@Gr/C composite anodes before and after cycling for 123 cycles; (a-b) Gr; (c-d) Si@Gr, 5 wt.% Si, 120 nm; (e-f) Si@Gr, 10 wt.% Si, 120 nm; (g-h) Si@Gr, 15 wt.% Si, 120 nm; (i-j) Si@Gr/C, 10 wt.% Si, 120 nm



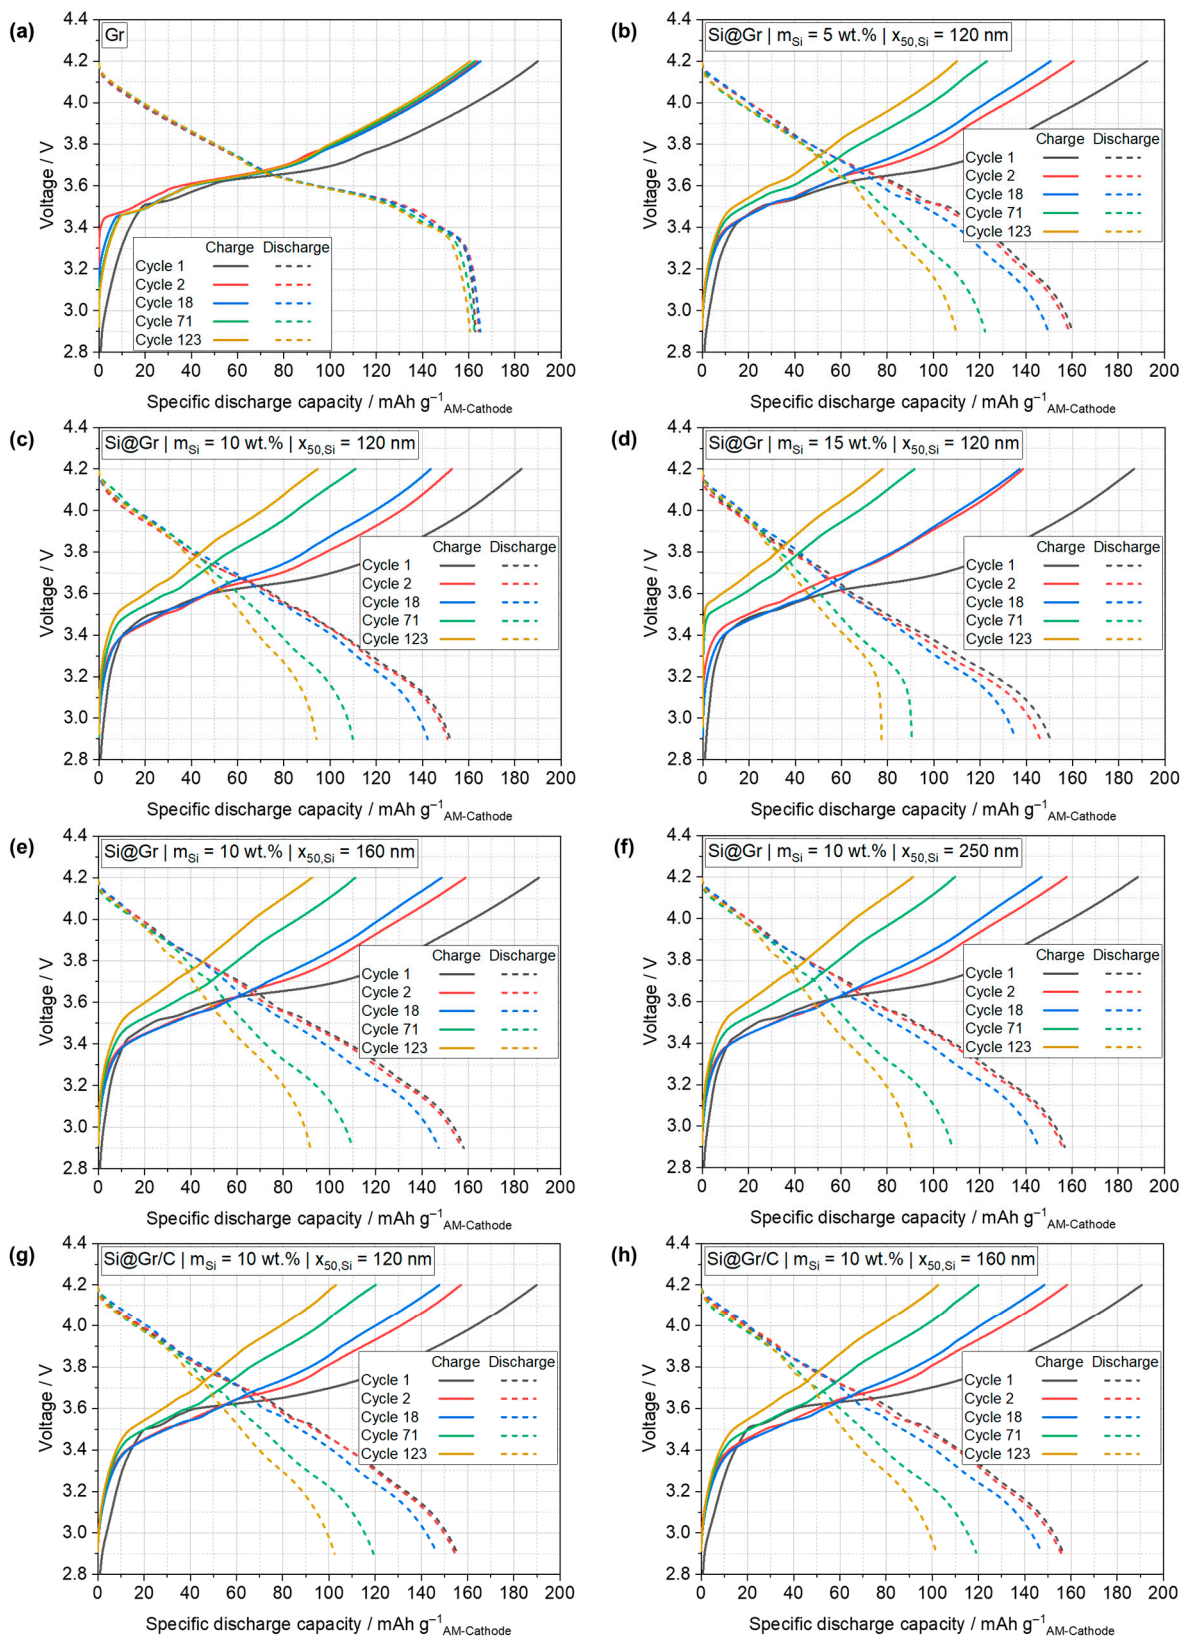

**Figure S6.** Voltage curves at different cycles (all at 0.1 C); (a) Gr; (b) Si@Gr, 5 wt.% Si; (c) Si@Gr, 10 wt.% Si; (d) Si@Gr, 15 wt.% Si, (e) Si@Gr, 160 nm Si; (f) Si@Gr, 250 nm Si; (g) Si@Gr/C, 120 nm Si; (h) Si@Gr/C, 160 nm Si

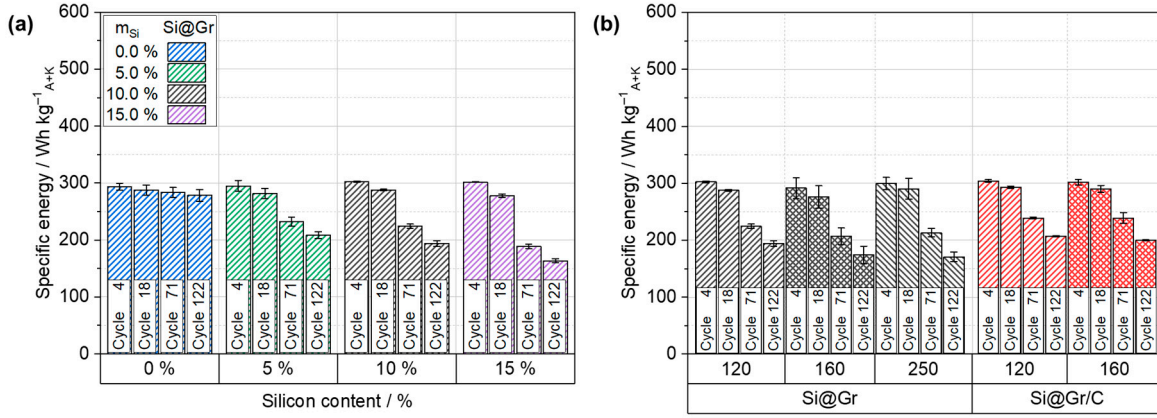

**Figure S7.** Specific energy (Wh kg<sup>-1</sup>); (a) of Si@Gr as a function of Si content for 120 nm Si NP; (b) of Si@Gr and Si@Gr/C as a function of Si particle size for 10 wt.% Si

#### Calculation of the energy density

$$W_V = \frac{W}{V_{Anode} + V_{Cathode} + \frac{1}{2} \cdot (V_{Cu} + V_{Al})}$$

$$= \frac{W}{A_{Anode} \cdot h_{Anode} + A_{Cathode} \cdot h_{Cathode} + \frac{1}{2} \cdot (A_{Cu} \cdot h_{Cu} + A_{Al} \cdot h_{Al})}$$

with

$$A_{Anode} = A_{Cathode} = A_{Cu} = A_{Al} = 254.47 \text{ mm}^2 = 2.54 \cdot 10^{-4} \text{ m}^2$$

$$h_{Cu} = 10 \text{ } \mu\text{m} = 1 \cdot 10^{-5} \text{ m}$$

$$h_{Al} = 20 \text{ } \mu\text{m} = 2 \cdot 10^{-5} \text{ m}$$

(S1)

|               |                                                                                         |
|---------------|-----------------------------------------------------------------------------------------|
| $W_V$         | Energy density / Wh L <sup>-1</sup>                                                     |
| $W$           | Energy / Wh                                                                             |
| $V_{Anode}$   | Volume of the anode coating / L                                                         |
| $V_{Cathode}$ | Volume of the cathode coating / L                                                       |
| $V_{Cu}$      | Volume of the copper substrate / L                                                      |
| $V_{Al}$      | Volume of the aluminium substrate / L                                                   |
| $A_{Anode}$   | Area of the anode / m <sup>2</sup>                                                      |
| $A_{Cathode}$ | Area of the cathode / m <sup>2</sup>                                                    |
| $A_{Cu}$      | Area of the copper substrate / m <sup>2</sup>                                           |
| $A_{Al}$      | Area of the aluminium substrate / m <sup>2</sup>                                        |
| $h_{Anode}$   | Height of the anode coating / m                                                         |
| $h_{Cathode}$ | Height of the cathode coating / m                                                       |
| $h_{Cu}$      | Height of the copper substrate / m (10 $\mu\text{m}$ , $1 \cdot 10^{-5} \text{ m}$ )    |
| $h_{Al}$      | Height of the aluminium substrate / m (20 $\mu\text{m}$ , $2 \cdot 10^{-5} \text{ m}$ ) |

### Calculation of the specific energy

$$W_m = \frac{W}{m_{Anode} + m_{Cathode} + \frac{1}{2} \cdot (m_{Cu} + m_{Al})} \quad (S2)$$

|               |                                      |
|---------------|--------------------------------------|
| $W_m$         | Specific energy / Wh m <sup>-1</sup> |
| $W$           | Energy / Wh                          |
| $m_{Anode}$   | Coating mass of the anode / kg       |
| $m_{Cathode}$ | Coating mass of the cathode / kg     |
| $m_{Cu}$      | Mass of the copper substrate / kg    |
| $m_{Al}$      | Mass of the aluminium substrate / kg |

**Table S1.** Overview of the anode coating thickness for the different produced electrodes; Thickness of used copper foil:  $h_{S,Cu} = 10 \mu\text{m}$

| Si content<br>$m_{Si}$<br>wt. % | Si particle size<br>$x_{Si}$<br>nm | Carbon<br>coating<br>- | Initial coating<br>thickness $h_{C,A,0}$<br>$\mu\text{m}$ | Coating thickness<br>123 cycles $h_{C,A,123}$<br>$\mu\text{m}$ | Rel. thickness<br>increase<br>% |
|---------------------------------|------------------------------------|------------------------|-----------------------------------------------------------|----------------------------------------------------------------|---------------------------------|
| 0.0                             | 120                                | -                      | 101                                                       | 105                                                            | 3.96                            |
| 5.0                             |                                    | -                      | 74                                                        | 94                                                             | 27.03                           |
| 10.0                            |                                    | -                      | 56                                                        | 83                                                             | 48.21                           |
| 15.0                            |                                    | -                      | 47                                                        | 88                                                             | 87.23                           |
| 10.0                            | 160                                | -                      | 63                                                        | 94                                                             | 49.21                           |
|                                 | 250                                | -                      | 56                                                        | 92                                                             | 64.29                           |
|                                 | 120                                | Yes                    | 73                                                        | 98                                                             | 34.25                           |
|                                 | 160                                | Yes                    | 73                                                        | 103                                                            | 41.10                           |

### Theoretical calculation of the specific surface area (SSA)

The specific surface area was calculated based on the particle shape of Si NPs. In the following an exemplary calculation for 1 g of Si@Gr composite with spherical Si NPs ( $x_{Si} = 120 \text{ nm}$ ,  $m_{Si} = 5 \text{ wt.}\%$ ) is shown:

1. Volume of one Si NP  $V_{Si,total}$

$$V_{Si,total} = \frac{m_{Si}}{\rho_{Si}}$$
$$V_{Si,total} = \frac{0.05 \text{ g}}{2.33 \frac{\text{g}}{\text{m}^3}} = 2.15 \cdot 10^{-8} \text{ m}^3 \quad (\text{S3-1})$$

2. Total volume of spherical Si NPs  $V_{Si,particle}$

$$V_{Si,particle} = \frac{1}{6} \cdot \pi \cdot x_{Si}^3$$
$$V_{Si,particle} = \frac{1}{6} \cdot \pi \cdot (1.2 \cdot 10^{-7} \text{ m})^3 = 9.05 \cdot 10^{-22} \text{ m}^3 \quad (\text{S4-1})$$

3. Total amount of Si NPs  $N_{Si,total}$  in the sample

$$N_{Si,total} = \frac{V_{Si,total}}{V_{Si,particle}}$$
$$N_{Si,total} = \frac{2.15 \cdot 10^{-8} \text{ m}^3}{9.05 \cdot 10^{-22} \text{ m}^3} = 2.37 \cdot 10^{13} \quad (\text{S5-1})$$

4. Surface area of one spherical Si NP  $S_{Si,particle}$

$$S_{Si,particle} = \pi \cdot x_{Si}^2$$
$$S_{Si,particle} = \pi \cdot (1.2 \cdot 10^{-7} \text{ m})^2 = 4.52 \cdot 10^{-14} \text{ m}^2 \quad (\text{S6-1})$$

5. Total surface area of spherical Si NPs  $S_{Si,total}$  in the sample

$$S_{Si,total} = N_{Si,total} \cdot S_{Si,particle}$$
$$S_{Si,total} = 2.37 \cdot 10^{13} \cdot 4.52 \cdot 10^{-14} \text{ m}^2 = 1.07 \text{ m}^2 \quad (\text{S7-1})$$

6. Total surface area of Gr particles  $S_{Gr,total}$  in the sample

$$S_{Gr,total} = S_{Gr} \cdot m_{Gr}$$
$$S_{Gr,total} = 2.89 \text{ m}^2 \cdot 0.95 = 2.75 \text{ m}^2 \quad (\text{S8-1})$$

7. Total surface area  $S_{total}$  in the sample

$$S_{total} = S_{Gr,total} + S_{Si,total}$$
$$S_{total} = 2.75 \text{ m}^2 + 1.07 \text{ m}^2 = 3.82 \text{ m}^2 \quad (\text{S9-1})$$

In order to take a plate-like shape of the Si NPs into account, equations **S2-1** and **S4-1** are replaced by equation **S2-2** and **S4-2**, respectively. The rest of the calculation remains the same. A good correlation was found for a diameter to height ratio of 8.

$$h_{Si} = \frac{1}{8} \cdot x_{Si} = \frac{1}{8} \cdot 1.2 \cdot 10^{-7} \text{ m} = 1.5 \cdot 10^{-8} \text{ m}.$$

2. Total volume of plate-like shaped Si NPs  $V_{Si,particle}$

$$V_{Si,particle} = \frac{1}{6} \cdot \pi \cdot x_{Si}^2 \cdot h_{Si}$$

$$V_{Si,particle} = \frac{1}{6} \cdot \pi \cdot (1.2 \cdot 10^{-7} \text{ m})^2 \cdot 1.5 \cdot 10^{-8} \text{ m} = 1.70 \cdot 10^{-22} \text{ m}^3 \quad (\text{S4-2})$$

3. Total amount of Si NPs  $N_{Si,total}$  in the sample

$$N_{Si,total} = \frac{V_{Si,total}}{V_{Si,particle}}$$

$$N_{Si,total} = \frac{2.15 \cdot 10^{-8} \text{ m}^3}{9.05 \cdot 10^{-22} \text{ m}^3} = 1.26 \cdot 10^{14} \quad (\text{S5-2})$$

4. Surface area of one plate-like shaped Si NP  $S_{Si,particle}$

$$S_{Si,particle} = \left( \frac{1}{4} \cdot \pi \cdot x_{Si}^2 \right) \cdot 2 + \pi \cdot x_{Si} \cdot h_{Si}$$

$$S_{Si,particle} = \left( \frac{1}{4} \cdot \pi \cdot (1.2 \cdot 10^{-7} \text{ m})^2 \right) \cdot 2 + \pi \cdot 1.2 \cdot 10^{-7} \text{ m} \cdot 1.5 \cdot 10^{-8} \text{ m} = 2.83 \cdot 10^{-14} \text{ m}^2 \quad (\text{S6-2})$$

5. Total surface area of plate-like shaped Si NPs  $S_{Si,total}$  in the sample

$$S_{Si,total} = N_{Si,total} \cdot S_{Si,particle}$$

$$S_{Si,total} = 1.26 \cdot 10^{14} \cdot 2.83 \cdot 10^{-14} \text{ m}^2 = 3.58 \text{ m}^2 \quad (\text{S7-2})$$

6. Total surface area of Gr particles  $S_{Gr,total}$  in the sample

$$S_{Gr,total} = S_{Gr} \cdot m_{Gr}$$

$$S_{Gr,total} = 2.89 \text{ m}^2 \cdot 0.95 = 2.75 \text{ m}^2 \quad (\text{S8-2})$$

7. Total surface area  $S_{total}$  in the sample

$$S_{total} = S_{Gr,total} + S_{Si,total}$$

$$S_{total} = 2.75 \text{ m}^2 + 3.58 \text{ m}^2 = 6.32 \text{ m}^2 \quad (\text{S9-2})$$
